# Supplementary material for: Hornerin contains a Linked Series of Ribosome-Targeting Peptide Antibiotics
Source: PubMed Central journal article supplement (PMC6212518; doi:10.1038/s41598-018-34467-8), 2018-11-01
Supplement: 41598_2018_34467_MOESM1_ESM.pdf [file 41598_2018_34467_MOESM1_ESM.pdf]

# Supplementary information

## Hornerin contains a Linked Series of Ribosome-Targeting Peptide Antibiotics

Ulrich Gerstel<sup>1,\*</sup>, Ties Latendorf<sup>1,\*</sup>, Joachim Bartels<sup>1</sup>, Alexander Becker<sup>2</sup>, Andreas Tholey<sup>2</sup>,  
Jens-Michael Schröder<sup>1,§</sup>

1 Dpt. of Dermatology, University-Hospital Schleswig-Holstein, Campus Kiel, Kiel, Germany

2 Institute for Experimental Medicine – AG Systematic Proteomics & Bioanalytics, Kiel  
University (CAU), Kiel, Germany

§ corresponding author

\* equal contribution

## Supplementary Figure S1

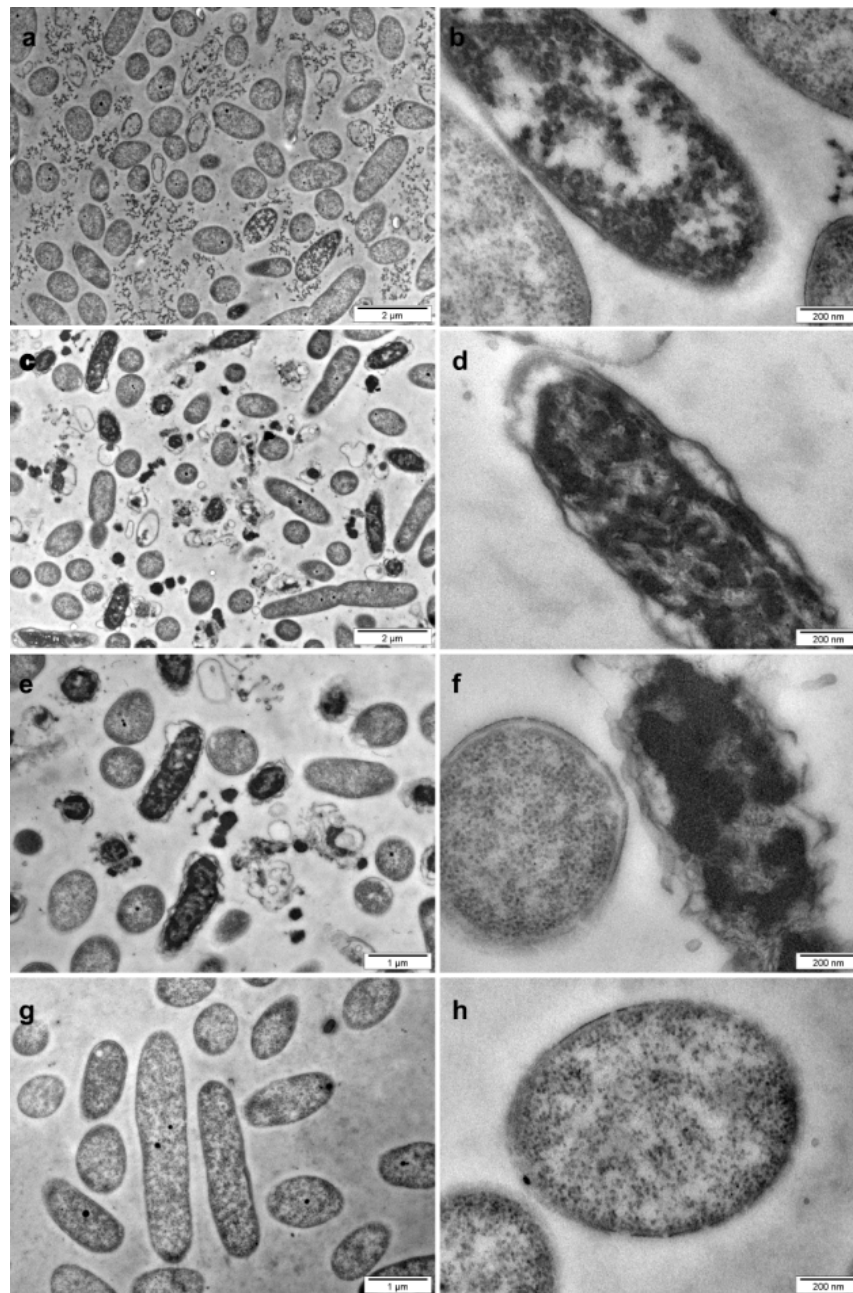

### Supplementary Fig. S1 | TEM of *P. aeruginosa*, treated with selected HRNR-peptides.

TEM analyses of  $6.25 \times 10^7$ /ml *P. aeruginosa* ATCC 11446, in 10 mM NaP/ 1 % TSB/ pH 5.5, treated with 667 μg/mL HRNR<sub>1132-1143</sub> (GSGSRQSPSYGR) (a, b), 667 μg/mL HRNR<sub>1132-1157</sub> (GSGSRQSPSYGRHGSGSRSSSSGQH) (c, d) and 667 μg/mL HRNR<sub>2606-2628</sub> (HGSRSGQSSRGERHGSSSGSSH) (e, f), respectively, for 1h at room temperature. Note the dodecapeptide HRNR<sub>1132-1143</sub> affecting only a limited number of cells, which are destroyed (a, b) in a similar fashion as seen with rSUMO3-HRNR<sub>2591-2684</sub> with widespread peeling of the outer membrane and extensive lysis with loss of the cytoplasmic electron-dense material. A limited number of *P. aeruginosa* ATCC 11446, treated with either HRNR<sub>1132-1157</sub> (c, d) or HRNR<sub>2606-2628</sub> (e, f) showed large blebs on the outer membrane. Cytoplasmic swelling was observed at the area where the outer membrane appeared to be ruptured. g, h, Control. Images are representative of two independent experiments, sampling on average 10 images per condition in each experiment.

## Supplementary Figure S2

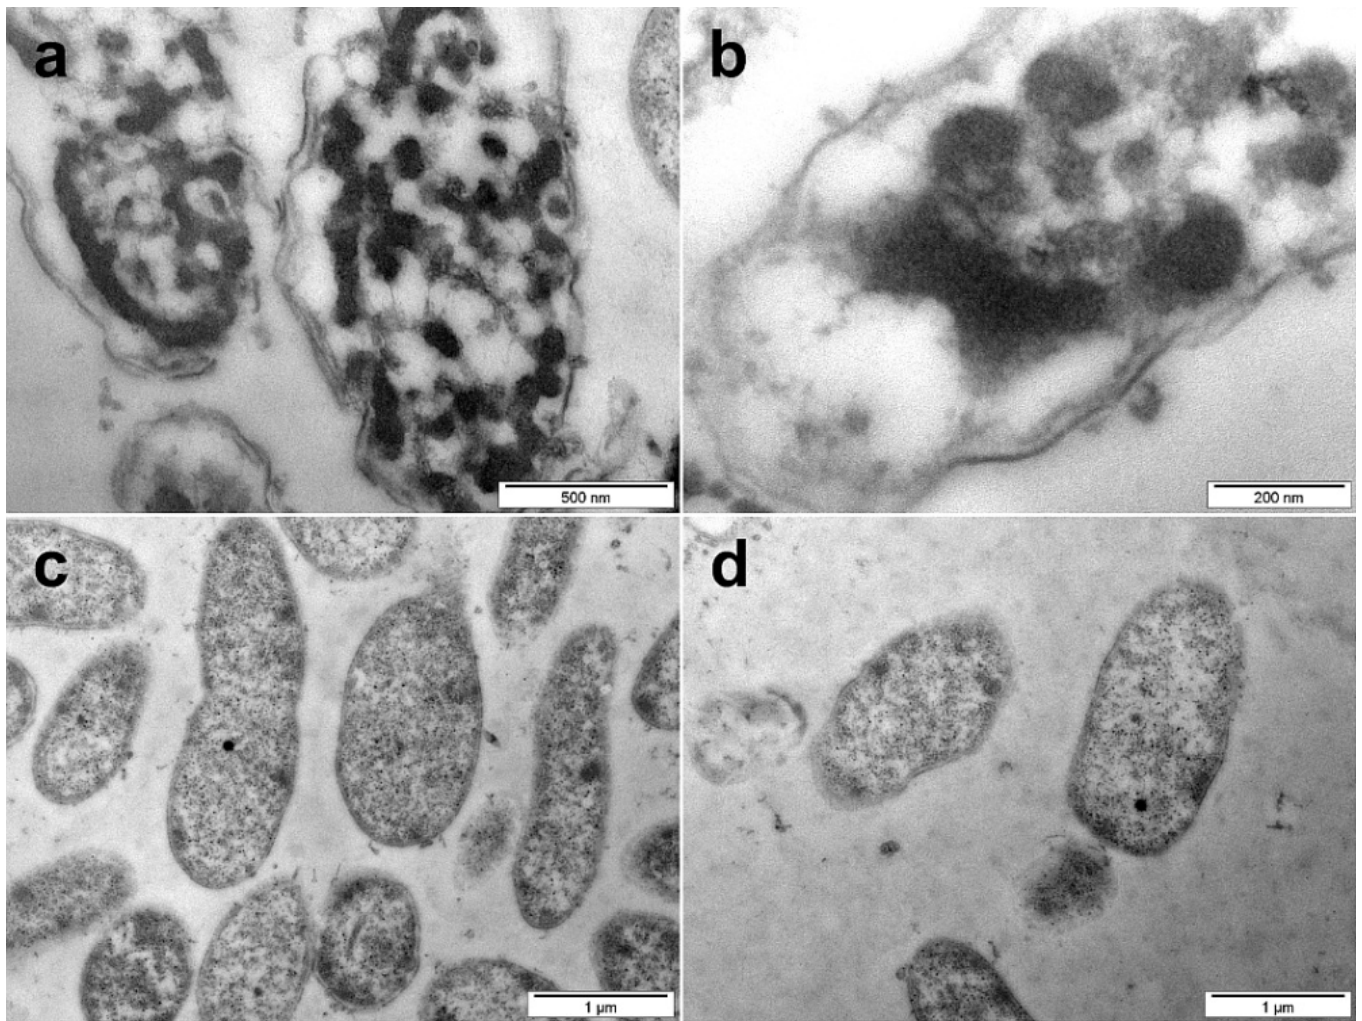

**Supplementary Figure S2 | TEM of HR 1-18-treated *P. aeruginosa*.** **a, b**, TEM of  $6.25 \times 10^7$ /ml *P. aeruginosa* ATCC 10145, in 10 mM NaP/ 0.25 % glucose/ pH 5.5, treated with 167 μg/mL HR1-18 (HRNR<sub>2556-2677</sub>)(GRHGSGLGHSSSHGQHGSGR) for 1h at ambient temperature. **c, d**, control. Note the condensation of electron-dense cytoplasmic material in HR1-18-treated bacteria (**a, b**). Images are representative of two independent experiments, sampling on average 10 images.

### Supplementary Figure S3

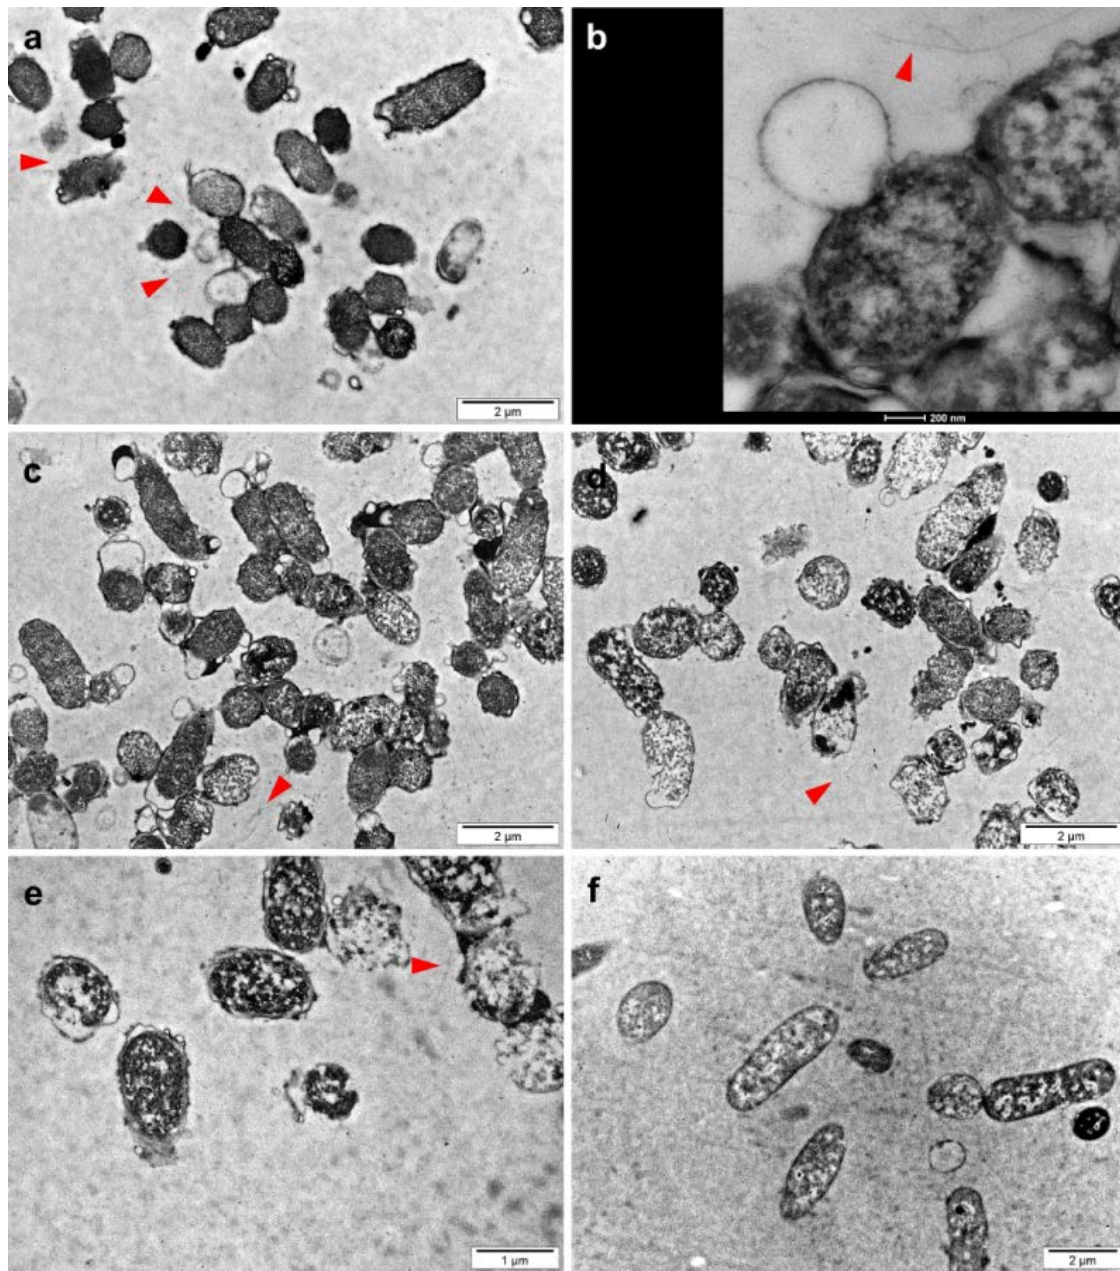

**Supplementary Figure S3 | Ultrastructure kinetics in rSUMO3-HRNR<sub>2591-2684</sub>-treated *E. coli*.** TEM of  $6.25 \times 10^7$ /ml *E. coli* ATCC 11775, in 10 mM NaP/ 1% TSB/ pH 5.5, treated with 500 μg/mL rSUMO3-HRNR<sub>2591-2684</sub> for 5min (a, b), 20min (c), 1h (d) and 2h (e) at RT. f, buffer control (2h treatment). Note the absence of membrane perturbation and the presence of few blebs of the outer membrane with an occasional ballooning and some electron-dense cytoplasmic aggregates already after 5 min incubation. After 1h and 2h treatment intracytoplasmic electron-dense aggregates accumulate in rSUMO3-HRNR<sub>2591-2684</sub>-treated bacteria (d, e). At higher magnification, in samples of rSUMO3-HRNR<sub>2591-2684</sub>-treated bacteria often nanofiber-like structures were detected (a - e, red arrows). Images are representative of two independent experiments, sampling on average 10 images per condition in each experiment.

## Supplementary Figure S4

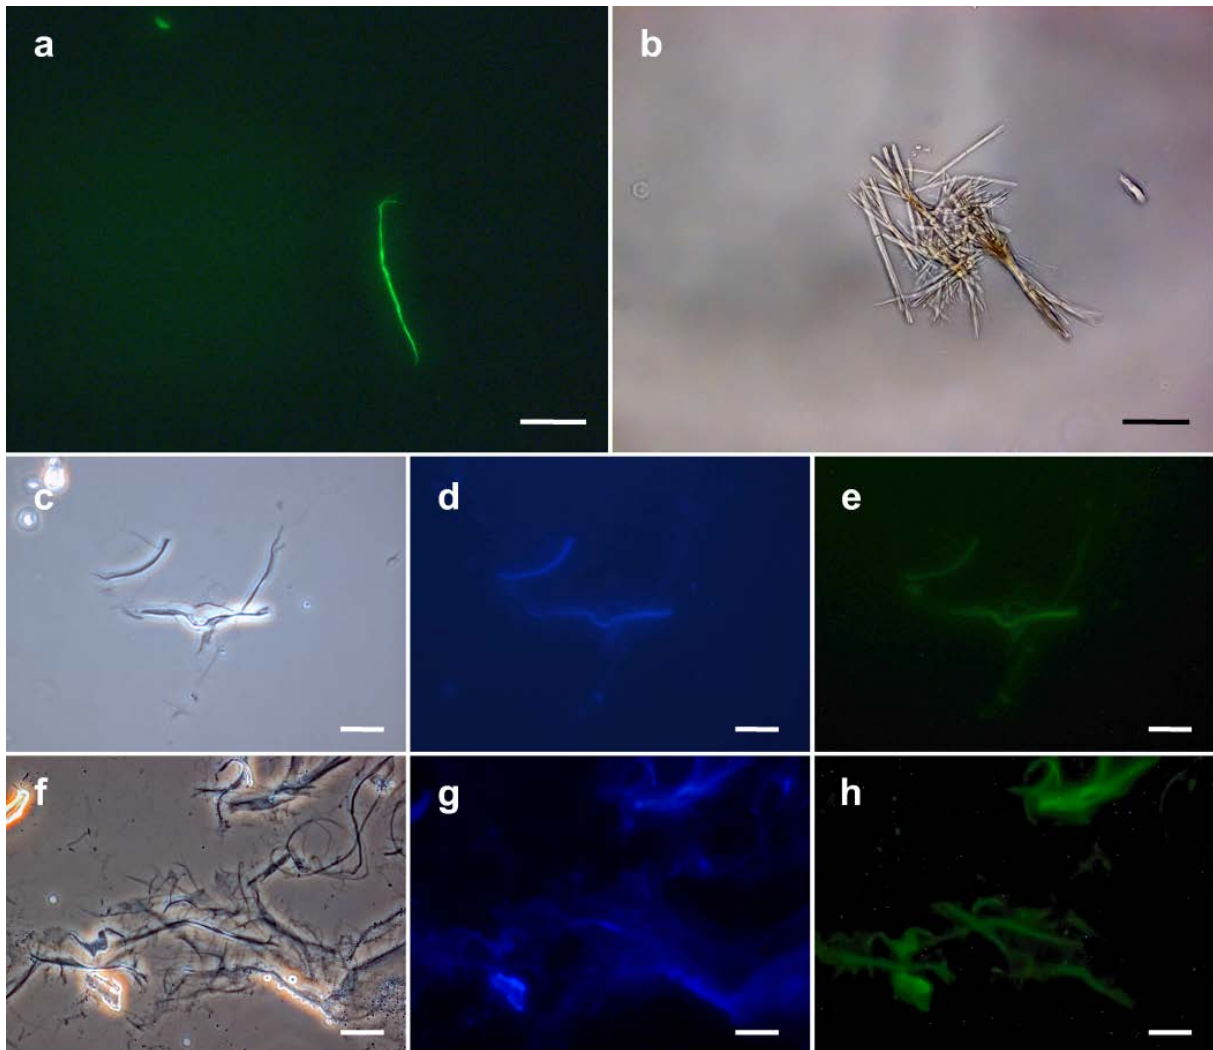

### Supplementary Figure S4 | rSUMO3-HRNR<sub>2591-2684</sub> forms amyloid-like nanostructures.

rSUMO3-HRNR<sub>2591-2684</sub> was treated with ultrasound and then analyzed by monitoring thioflavin T fluorescence (**a**) and light microscopy (**b**) for amyloid-formation. In a second experimental series, FITC-labeled rSUMO3-HRNR<sub>2591-2684</sub> was treated with ultrasound and then monitored by light microscopy (**c, f**), for DAPI-staining (**d, g**) and for fluorescence, after storage for 1 h (**c - e**) and 20 h (**f - h**), respectively. Scale bar 20  $\mu\text{m}$ .

## Supplementary Figure S5

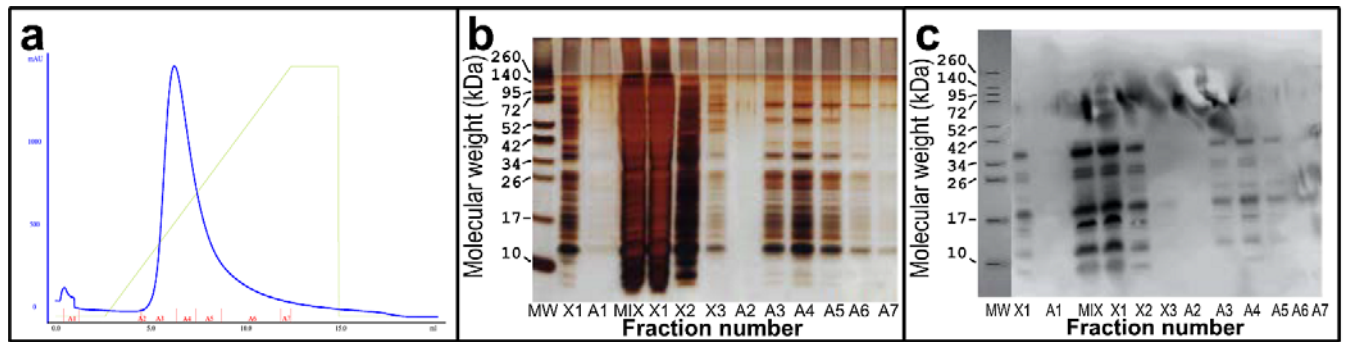

**Supplementary Figure S5 | Identification of rSUMO3-HRNR<sub>2591-2684</sub>-interacting proteins upon SulfoLink<sup>®</sup>-coupling resin-chromatography.** An *E. coli*-extract was applied to a SulfoLink<sup>®</sup>-column and bound proteins were eluted with an increasing gradient of NH<sub>4</sub>Cl-buffer (a). Aliquots of each fraction were analyzed by SDS-PAGE and silver staining (b) and by a Far-Western blot (c) using rSUMO3-HRNR<sub>2591-2684</sub> as “bait” protein and polyclonal antibodies against HRNR<sub>2591-2684</sub> for visualization of protein interaction. MW: molecular weight standards; MIX: crude *E. coli*-extract; X1 - X3: unbound material; A1 - A7: bound material.

## Supplementary Figure S6

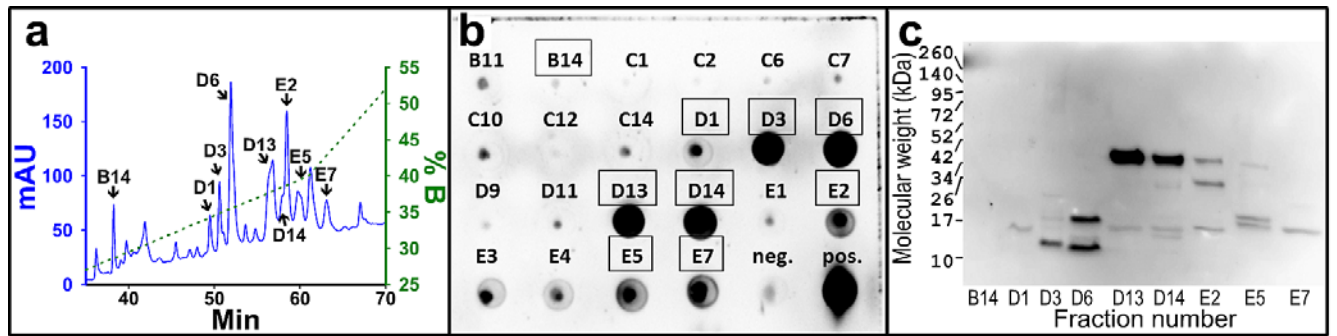

**Supplementary Figure S6 | rSUMO3-HRNR<sub>2591-2684</sub> binds to *E. coli* ribosomal proteins.** SulfoLink<sup>®</sup>-column-bound proteins of an *E. coli*-extract were separated on a Jupiter<sup>®</sup> 300Å C18-RP-HPLC column and eluted with an increasing gradient of 2-propanol (Prp) in aqueous 0.1 % TFA (a). Aliquots of UV-absorbing peak fractions were analyzed in a Far- SUMO3-HRNR<sub>2591-2684</sub>-dotblot analysis (b) and dotblot-positive fractions (highlighted as boxes) were subjected to a Far-rSUMO3-HRNR<sub>2591-2684</sub>-Westernblot analysis (c). Note the presence of the most intensive band at 37 kDa (D13 and D14), and ~20 more or less intensive bands corresponding to a MW between 12 and 34 kDa.

## Supplementary Figure S7a, b

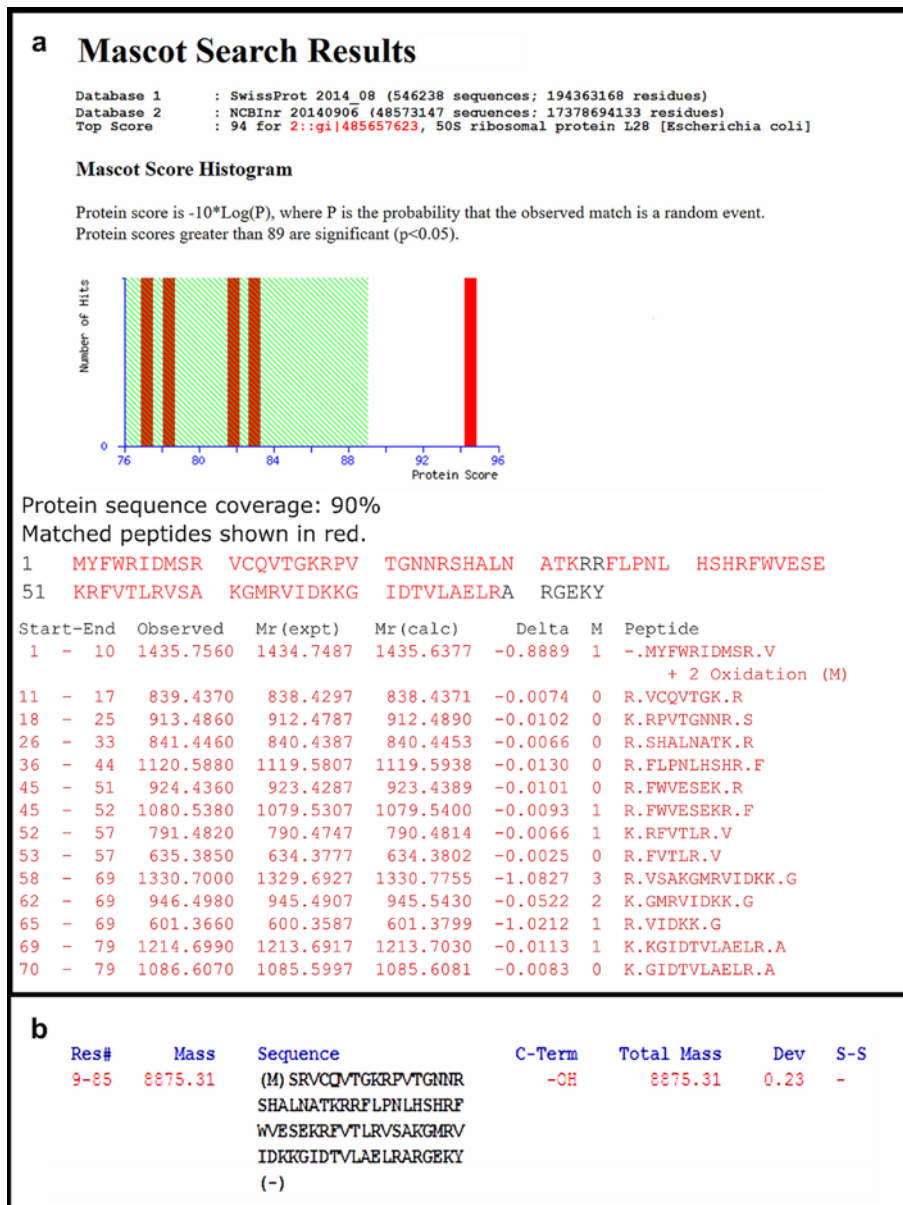

**Supplementary Figure S7a, b | Identification of *E. coli* 50S ribosomal protein L28 in rSUMO3-HRNR<sub>2591-2684</sub>-Far-Westernblot-positive HPLC fractions.** In fraction D3 (Supplementary Figure S6) the *E. coli* 50S ribosomal protein L28 was identified (Mascot search reveals amino acid sequences of matching peptide fragments (a, b). MS-analysis of the D3 fraction before digestion revealed a major 8876,092 Da mass (average [Mr+H] mass) corresponding to an NH<sub>2</sub>-terminally truncated version of L28 (residues 9-85).



## Supplementary Figure S7c – g

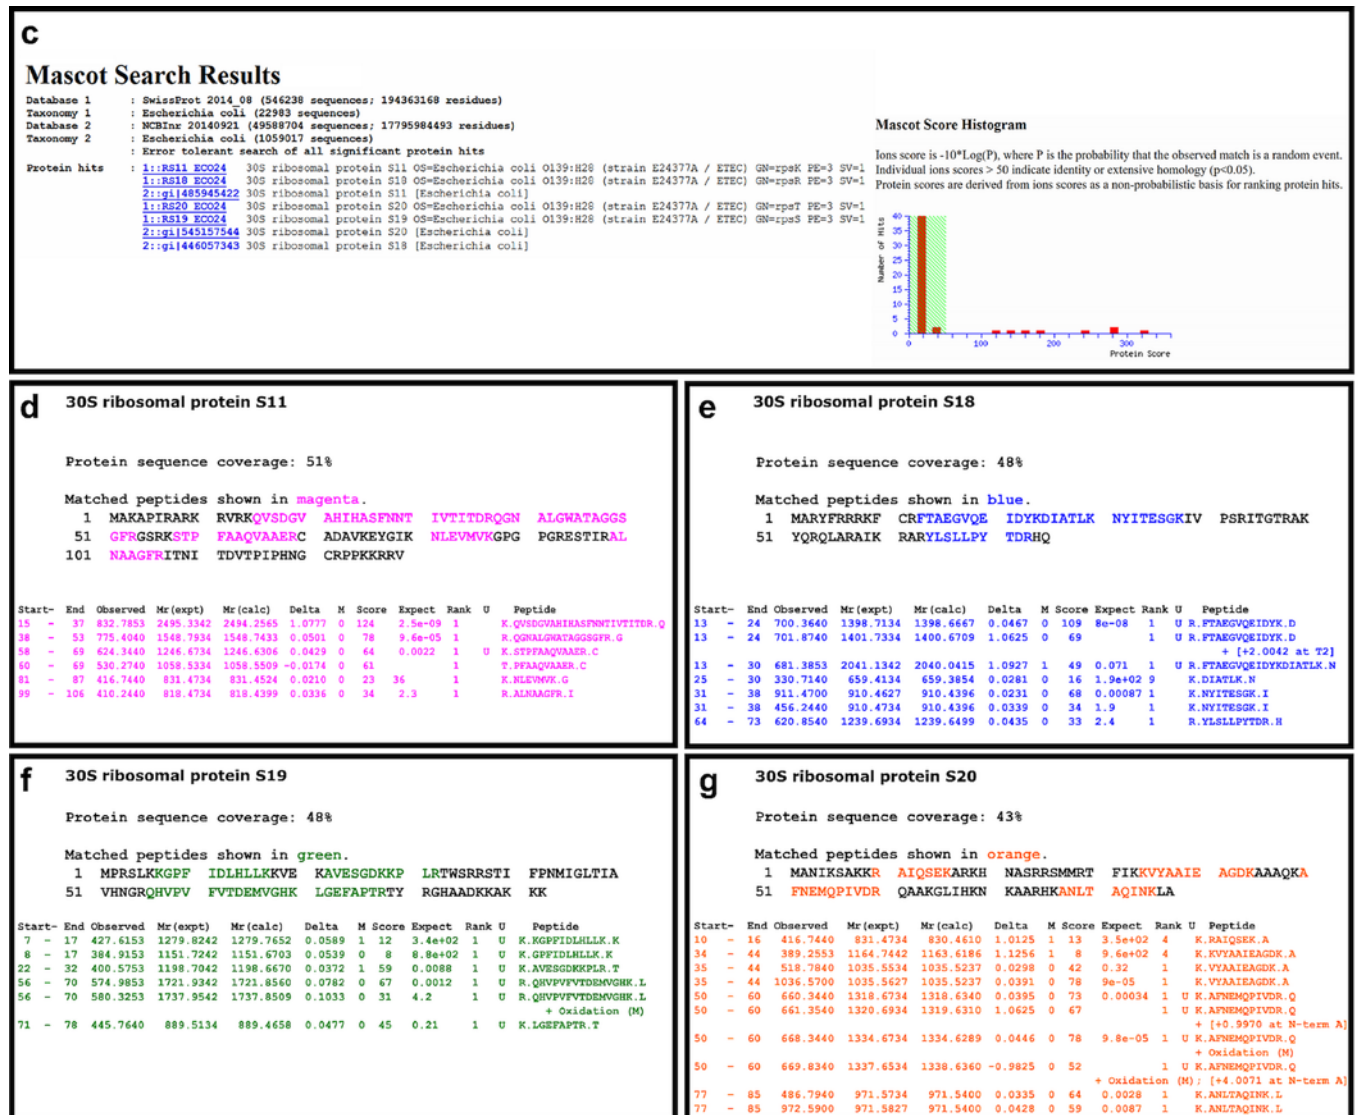

Supplementary Figure S7c-g | Identification of the *E. coli* 30S ribosomal proteins S11, S18, S19 and S20 in SUMO3-HRNR<sub>2591-2684</sub>-Far-Westernblot-positive HPLC fractions. In fraction D6 (Supplementary Figure S6) the *E. coli* 30S ribosomal proteins S11, S18, S19 and S20 were identified. Amino acid sequences of identified peptide fragments from digested D6 fraction are shown separately for each 30S ribosomal protein using separate colors for different ribosomal proteins (c - g).

## Supplementary Figure S7h, i

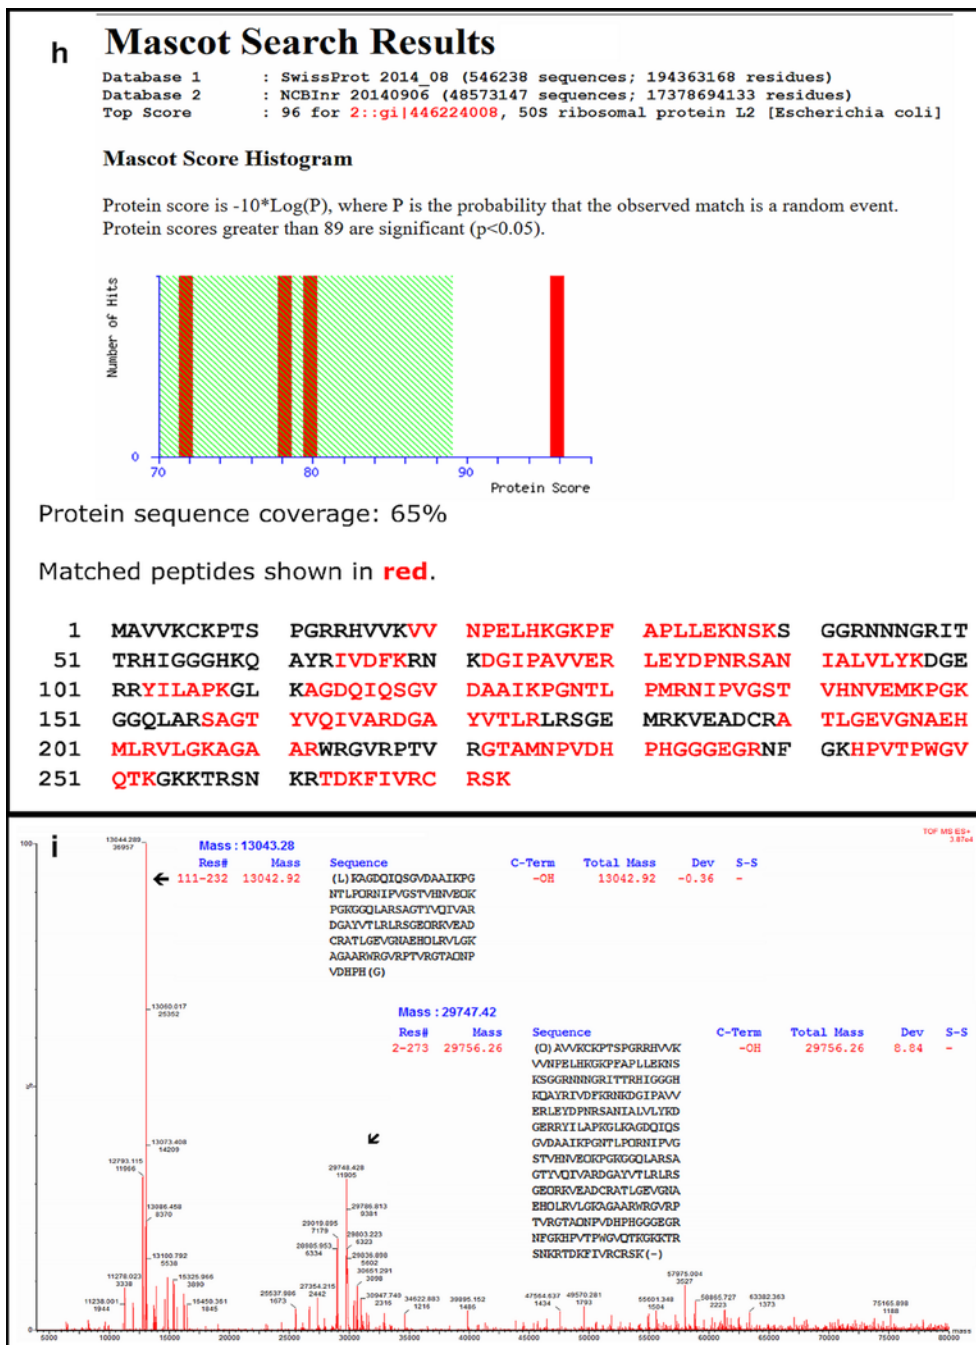

**Supplementary Figure S7h, i | Identification of the 50S *E. coli* ribosomal protein L2 in rSUMO3-HRNR<sub>2591-2684</sub>-Far-Westernblot-positive HPLC fractions.** In fraction D13 (Supplementary Figure S6) the *E. coli* 50S ribosomal protein L2 was identified (h, i). MS-analysis of the D13 fraction before digestion revealed 2 major constituents (i). The 29748.428 da (average  $[M_r+H]$ ) mass matches most closely to the calculated  $M_r$  mass for the entire L2 amino acid sequence lacking the aminoterminal methionine. The most intense 13044.289 da mass signal most probably represents an internal L2 fragment (i).

## Supplementary Figure S8

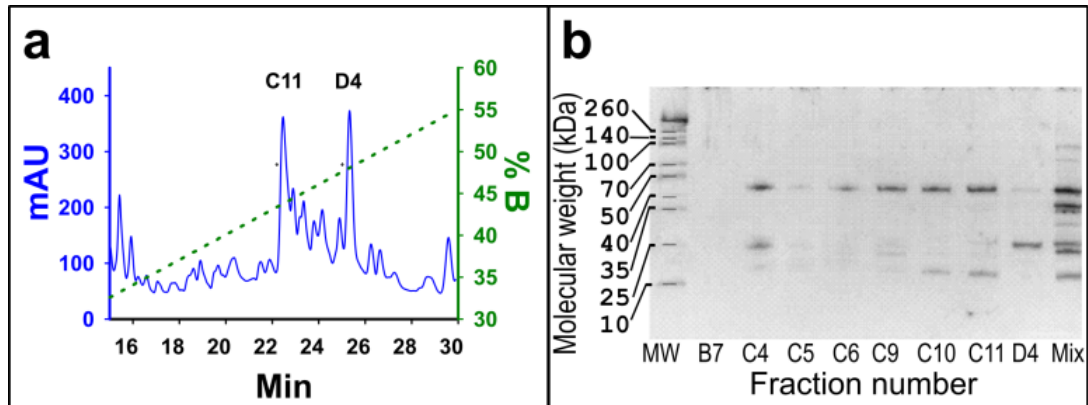

**Supplementary Figure S8 | HRNR<sub>2591-2684</sub> binds to 30S and 50S *E. coli* ribosomal proteins.** SulfoLink<sup>®</sup>-column-bound proteins of an *E. coli*-extract were separated on a Jupiter<sup>®</sup> 300Å C18-RP-HPLC column and were eluted with an increasing gradient of acetonitrile (ACN) in aqueous 0.1 % TFA (a). Aliquots of selected, in a HRNR-Far-Dotblot analysis positive HPLC fractions (C4 - D4) as well as SulfoLink<sup>®</sup>-column-bound proteins as control (Mix), were subjected to a HRNR-Far-Westernblot and analyzed with HRNR<sub>2591-2684</sub> antibodies (b). Some bands seen in the crude ribosome extract (mix) are missing in HPLC fractions (e.g. at 20, 24 and 25 kDa). MW: Molecular weight marker.

## Supplementary Figure S9

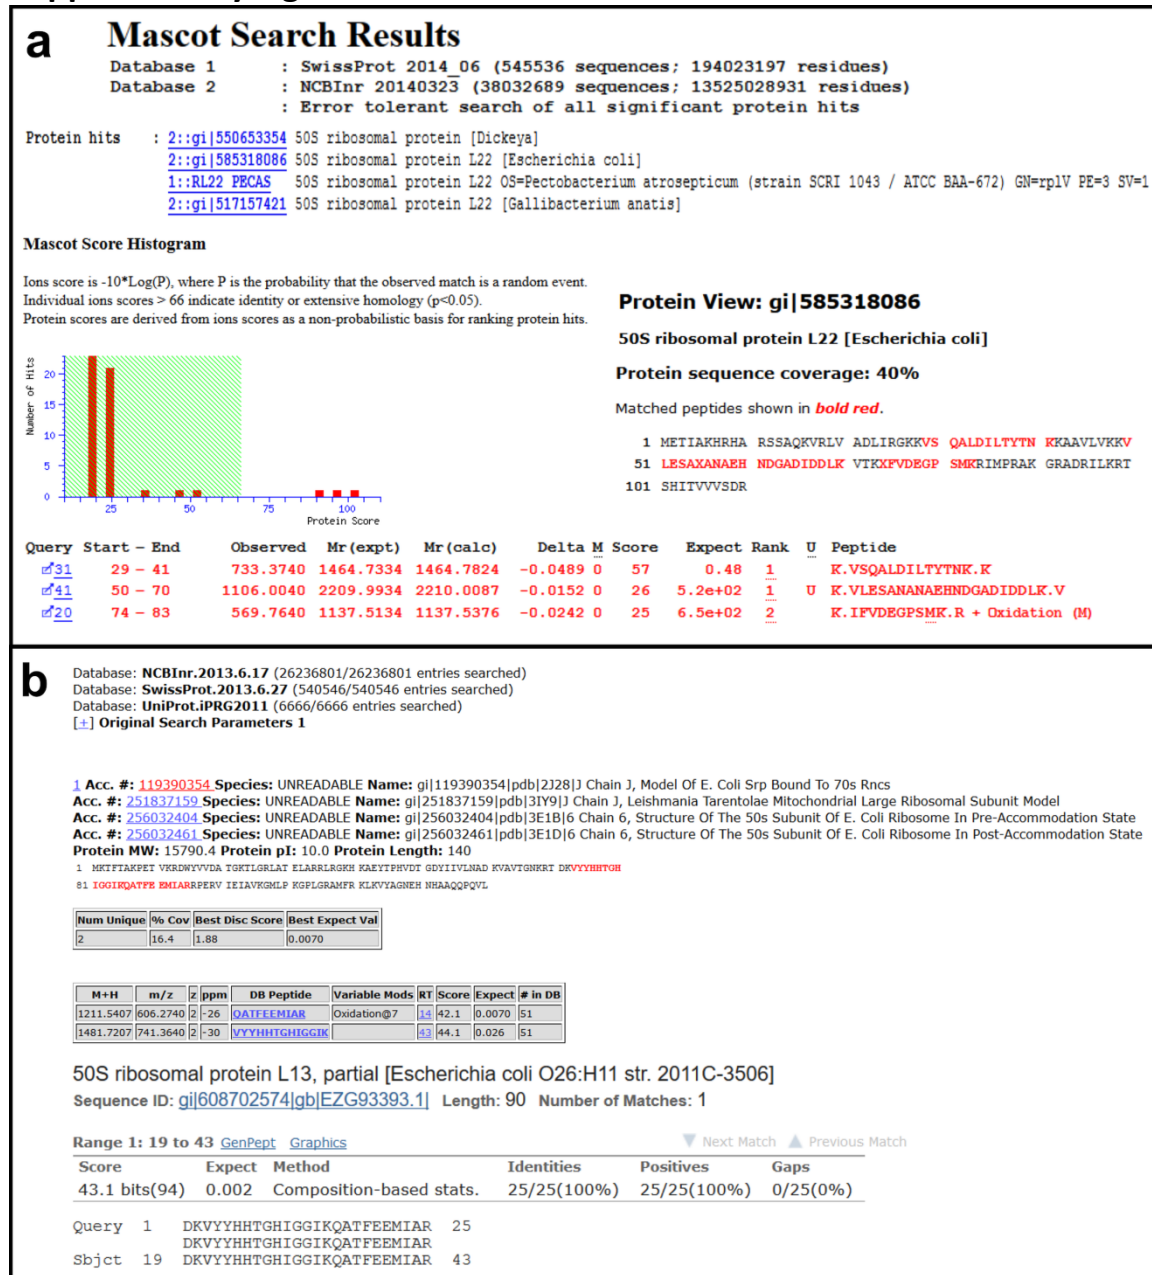

Supplementary Figure S9 | Identification of 50S *E. coli* ribosomal proteins L22 and L13 in HRNR<sub>2591-2684</sub>-Far-Westernblot-positive HPLC fractions. SulfoLink®-column-bound proteins of an *E. coli*-extract, separated on a Jupiter 300Å C18-RP-HPLC column, eluted with acetonitrile, showing band(s) upon HRNR<sub>2591-2684</sub>-Far-Westernblot (Supplementary Figure S8), were subjected to reduction, alkylation and tryptic digestion with subsequent MS/MS analysis at a QTOF-2 ESI-MS. Whereas in fraction D4 the *E. coli* 50S ribosomal protein L22 was identified (a), MS/MS analyses revealed the *E. coli* 50S ribosomal protein L13 in fraction C11 (b).

## Supplementary Figure S10

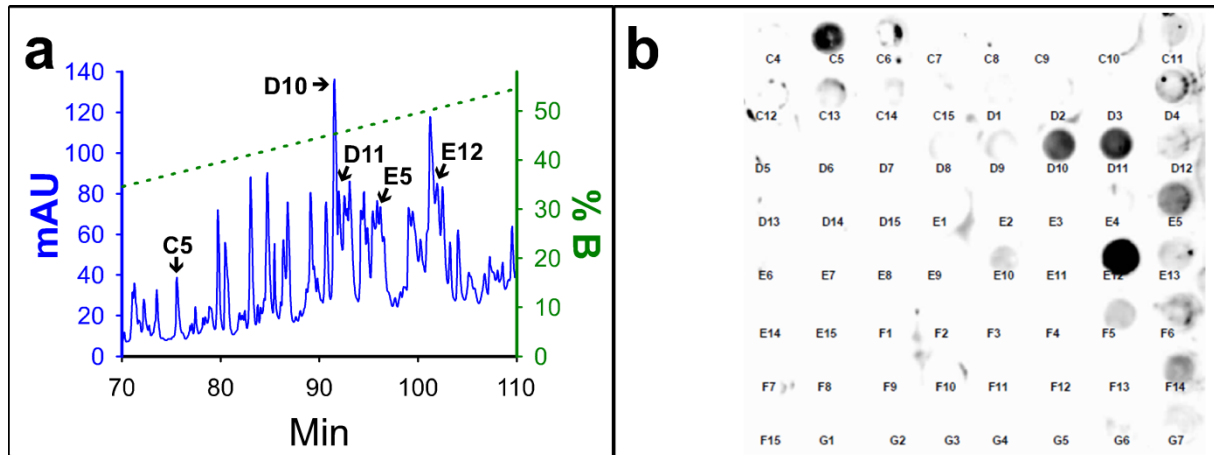

**Supplementary Figure S10 | LC-MS/MS analyses identify a wide range of 50S and 30S *E. coli* ribosomal proteins with apparent HRNR-binding properties.** SulfoLink<sup>®</sup>-column-bound proteins of an *E. coli*-extract were separated on a **Aeris<sup>®</sup> widepore RP-HPLC column** with a gradient of **Prp in aqueous 0.1 % TFA (a)** and fractions were analyzed for rSUMO3-HRNR<sub>2591-2684</sub>-binding proteins in a HRNR-Far-dot blot system (**b**). Note strongest dots in fractions **C5, D10, D11, E5 and E12**.

## Supplementary Figure S11

| Accession | Description                                                      | Score  |
|-----------|------------------------------------------------------------------|--------|
| W1G3Y5    | 30S ribosomal protein S10 OS=Escherichia coli ISC11 GN=rpsJ PE=  | 22,27  |
| W1G5N2    | 30S ribosomal protein S11 OS=Escherichia coli ISC11 GN=rpsK PE=  | 12,95  |
| W1FQT2    | 30S ribosomal protein S12 OS=Escherichia coli ISC11 GN=rpsL PE=  | 16,63  |
| W1FUI0    | 30S ribosomal protein S2 OS=Escherichia coli ISC11 GN=rpsB PE=   | 130,12 |
| W1G3V3    | 30S ribosomal protein S3 OS=Escherichia coli ISC11 GN=rpsC PE=   | 121,77 |
| W1G3T6    | 30S ribosomal protein S4 OS=Escherichia coli ISC11 GN=rpsD PE=   | 52,04  |
| W1G3W9    | 30S ribosomal protein S5 OS=Escherichia coli ISC11 GN=rpsE PE=   | 60,37  |
| W1G2U2    | 30S ribosomal protein S6 OS=Escherichia coli ISC11 GN=rpsF PE=   | 39,47  |
| W1G2I3    | 50S ribosomal protein L10 OS=Escherichia coli ISC11 GN=rplJ PE=  | 35,14  |
| W1G1R6    | 50S ribosomal protein L11 OS=Escherichia coli ISC11 GN=rplK PE=  | 19,38  |
| W1G5Q1    | 50S ribosomal protein L14 OS=Escherichia coli ISC11 GN=rplN PE=  | 8,93   |
| W1G3U0    | 50S ribosomal protein L15 OS=Escherichia coli ISC11 GN=rplO PE=  | 37,59  |
| W1G7H8    | 50S ribosomal protein L17 OS=Escherichia coli ISC11 GN=rplQ PE=  | 11,89  |
| W1G7I8    | 50S ribosomal protein L18 OS=Escherichia coli ISC11 GN=rplR PE=  | 7,37   |
| W1G7K5    | 50S ribosomal protein L2 OS=Escherichia coli ISC11 GN=rplB PE=   | 23,78  |
| W1G2X9    | 50S ribosomal protein L20 OS=Escherichia coli ISC11 GN=rplT PE=  | 41,15  |
| W1FUZ6    | 50S ribosomal protein L21 OS=Escherichia coli ISC11 PE=3 SV=1    | 24,46  |
| W1G6I1    | 50S ribosomal protein L23 OS=Escherichia coli ISC11 GN=rplW PE=  | 9,52   |
| W1G3U9    | 50S ribosomal protein L24 OS=Escherichia coli ISC11 GN=rplX PE=  | 12,00  |
| W1FT83    | 50S ribosomal protein L3 glutamine methyltransferase OS=Escheri  | 14,93  |
| W1G5R1    | 50S ribosomal protein L3 OS=Escherichia coli ISC11 GN=rplC PE=   | 37,65  |
| W1G3V7    | 50S ribosomal protein L4 OS=Escherichia coli ISC11 GN=rplD PE=   | 220,74 |
| W1G602    | 50S ribosomal protein L5 OS=Escherichia coli ISC11 GN=rplE PE=   | 95,61  |
| W1G5Z8    | 50S ribosomal protein L6 OS=Escherichia coli ISC11 PE=3 SV=1 -   | 5,80   |
| W1G0Z3    | 50S ribosomal protein L9 OS=Escherichia coli ISC11 GN=rplI PE=3  | 123,48 |
| W1G024    | LSU ribosomal protein L1p (L10Ae) OS=Escherichia coli ISC11 PE=  | 25,49  |
| W1G016    | LSU ribosomal protein L7/L12 (P1/P2) OS=Escherichia coli ISC11 f | 376,57 |
| W1G3L1    | Ribosomal protein OS=Escherichia coli ISC11 PE=3 SV=1 - [W1G3    | 29,47  |
| W1FWK2    | Ribosomal RNA small subunit methyltransferase C OS=Escherichia   | 12,87  |
| W1FZR0    | Ribosomal RNA small subunit methyltransferase E OS=Escherichia   | 5,62   |
| W1FUM5    | Ribosomal silencing factor RsfS OS=Escherichia coli ISC11 GN=rsf | 92,69  |
| W1FS83    | SSU ribosomal protein S1p OS=Escherichia coli ISC11 PE=4 SV=1    | 294,85 |
| W1FR69    | SSU ribosomal protein S7p (S5e) OS=Escherichia coli ISC11 PE=4   | 14,31  |

| Protein          | Peptide sequence                    | Modification(s)         |
|------------------|-------------------------------------|-------------------------|
| 30S ribosomal pr | LVDIVPEPTKTVDALMR                   |                         |
| 30S ribosomal pr | FTVLISPHVNKDAR                      |                         |
| 30S ribosomal pr | FTVLISPHVNKDARDQYEIR                |                         |
| 30S ribosomal pr | LVDIVPEPTK                          |                         |
| 30S ribosomal pr | ITNITDVTPIPHnGcRPPK                 | N13(Deamidated); C15(Pr |
| 30S ribosomal pr | QGNALGWATAGGSGFR                    |                         |
| 30S ribosomal pr | KSTPFAAQVAER                        |                         |
| 30S ribosomal pr | LTNGFEVTSYIGGEGHNLQEHSVILIR         |                         |
| 30S ribosomal pr | SNVPALEAcPQKR                       | C9(Propionamide)        |
| 30S ribosomal pr | GALDcSGVKDR                         | C5(Propionamide)        |
| 30S ribosomal pr | ELEKLENSLGGIKDmGGLPDALFVIDADHEHIAIK | M15(Oxidation)          |
| 30S ribosomal pr | ELEKLENSLGGIKDMGGLPDALFVIDADHEHIAIK |                         |
| 30S ribosomal pr | LENSLGGIKDMGGLPDALFVIDADHEHIAIK     |                         |
| 30S ribosomal pr | DMGGLPDALFVIDADHEHIAIK              |                         |
| 30S ribosomal pr | EANNLGIPVFAIVDTNSDPDGVDFVIPGNDDAIR  |                         |
| 30S ribosomal pr | SQDLASQAEESFVEAE                    |                         |
| 30S ribosomal pr | ELEKLENSLGGIK                       |                         |
| 30S ribosomal pr | TVPMFNEALAELENKISAR                 |                         |
| 30S ribosomal pr | GKILFVGTKR                          |                         |
| 30S ribosomal pr | NKVHIINLEK                          |                         |
| 30S ribosomal pr | TVPmFNEALAELENK                     | M4(Oxidation)           |
| 30S ribosomal pr | WLGGMILTNNWK                        |                         |
| 30S ribosomal pr | AGVHFGHQTR                          |                         |

## Supplementary Figure S11 | All-Fractions-Precursor-Ion-Area.

## Supplementary Figure S12

| Fraction                                                                 | Protein                                                           | # Unique Peptides                             | Sequence Coverage (%) |        |
|--------------------------------------------------------------------------|-------------------------------------------------------------------|-----------------------------------------------|-----------------------|--------|
| C5                                                                       | 30S ribosomal protein S12 OS=Escherichia coli                     | 4                                             | 20,16%                |        |
|                                                                          | 30S ribosomal protein S21 OS=Escherichia coli                     | 3                                             | 29,58%                |        |
|                                                                          | 50S ribosomal protein L2 OS=Escherichia coli                      | 3                                             | 14,65%                |        |
| D10                                                                      | 10 kDa chaperonin OS=Escherichia coli                             | 2                                             | 17,53%                |        |
|                                                                          | 30S ribosomal protein S10 OS=Escherichia coli                     | 2                                             | 13,59%                |        |
|                                                                          | 30S ribosomal protein S11 OS=Escherichia coli                     | 4                                             | 36,64%                |        |
|                                                                          | 30S ribosomal protein S16 OS=Escherichia coli                     | 3                                             | 25,61%                |        |
|                                                                          | 30S ribosomal protein S3 OS=Escherichia coli                      | 6                                             | 27,47%                |        |
|                                                                          | 30S ribosomal protein S4 OS=Escherichia coli                      | 6                                             | 32,45%                |        |
|                                                                          | 30S ribosomal protein S6 OS=Escherichia coli                      | 2                                             | 13,74%                |        |
|                                                                          | 50S ribosomal protein L13 OS=Escherichia coli                     | 16                                            | 77,46%                |        |
|                                                                          | 50S ribosomal protein L14 OS=Escherichia coli                     | 6                                             | 55,28%                |        |
|                                                                          | 50S ribosomal protein L16 OS=Escherichia coli                     | 3                                             | 28,68%                |        |
|                                                                          | 50S ribosomal protein L17 OS=Escherichia coli                     | 6                                             | 37,01%                |        |
|                                                                          | 50S ribosomal protein L18 OS=Escherichia coli                     | 5                                             | 45,30%                |        |
|                                                                          | 50S ribosomal protein L2 OS=Escherichia coli                      | 19                                            | 52,01%                |        |
|                                                                          | 50S ribosomal protein L3 OS=Escherichia coli                      | 4                                             | 21,53%                |        |
|                                                                          | 50S ribosomal protein L4 OS=Escherichia coli                      | 7                                             | 37,81%                |        |
|                                                                          | 50S ribosomal protein L6 OS=Escherichia coli                      | 2                                             | 16,50%                |        |
|                                                                          | 50S ribosomal protein L9 OS=Escherichia coli                      | 3                                             | 24,16%                |        |
| D11                                                                      | Cysteine desulfurase IscS OS=Escherichia coli                     | 2                                             | 7,67%                 |        |
|                                                                          | DNA-binding protein OS=Escherichia coli                           | 4                                             | 23,36%                |        |
|                                                                          | DNA-directed RNA polymerase subunit alpha OS=Escherichia coli     | 8                                             | 70,15%                |        |
|                                                                          | Ferredoxin, 2Fe-2S OS=Escherichia coli                            | 2                                             | 18,92%                |        |
|                                                                          | FKBP-type peptidyl-prolyl cis-trans isomerase OS=Escherichia coli | 2                                             | 28,69%                |        |
|                                                                          | Pseudouridine synthase OS=Escherichia coli                        | 5                                             | 22,13%                |        |
|                                                                          | Pseudouridine synthase OS=Escherichia coli                        | 3                                             | 15,46%                |        |
|                                                                          | Ribosomal protein OS=Escherichia coli                             | 2                                             | 17,99%                |        |
|                                                                          | Seryl-tRNA synthetase OS=Escherichia coli                         | 2                                             | 15,18%                |        |
|                                                                          | Signal recognition particle protein OS=Escherichia coli           | 2                                             | 5,74%                 |        |
|                                                                          | Single-stranded DNA-binding protein OS=Escherichia coli           | 2                                             | 13,04%                |        |
|                                                                          | SSU ribosomal protein S7p (S5e) OS=Escherichia coli               | 4                                             | 53,57%                |        |
|                                                                          | SSU ribosomal protein S8p (S15Ae) OS=Escherichia coli             | 2                                             | 22,83%                |        |
|                                                                          | Translation elongation factor Tu OS=Escherichia coli              | 2                                             | 19,40%                |        |
|                                                                          | 30S ribosomal protein S3 OS=Escherichia coli                      | 2                                             | 16,74%                |        |
|                                                                          | 30S ribosomal protein S4 OS=Escherichia coli                      | 2                                             | 13,25%                |        |
|                                                                          | 50S ribosomal protein L13 OS=Escherichia coli                     | 10                                            | 48,59%                |        |
|                                                                          | 50S ribosomal protein L14 OS=Escherichia coli                     | 3                                             | 44,72%                |        |
|                                                                          | 50S ribosomal protein L18 OS=Escherichia coli                     | 5                                             | 56,41%                |        |
|                                                                          | 50S ribosomal protein L2 OS=Escherichia coli                      | 4                                             | 23,08%                |        |
|                                                                          | E5                                                                | 30S ribosomal protein S10 OS=Escherichia coli | 3                     | 21,36% |
|                                                                          |                                                                   | 30S ribosomal protein S3 OS=Escherichia coli  | 10                    | 48,50% |
|                                                                          |                                                                   | 30S ribosomal protein S4 OS=Escherichia coli  | 4                     | 37,09% |
| 30S ribosomal protein S6 OS=Escherichia coli                             |                                                                   | 8                                             | 67,18%                |        |
| 50S ribosomal protein L14 OS=Escherichia coli                            |                                                                   | 2                                             | 30,08%                |        |
| 50S ribosomal protein L22 OS=Escherichia coli                            |                                                                   | 3                                             | 35,45%                |        |
| 50S ribosomal protein L23 OS=Escherichia coli                            |                                                                   | 4                                             | 39,00%                |        |
| E12                                                                      | 50S ribosomal protein L5 OS=Escherichia coli                      | 3                                             | 18,44%                |        |
|                                                                          | 50S ribosomal protein L9 OS=Escherichia coli                      | 2                                             | 22,15%                |        |
|                                                                          | 30S ribosomal protein S2 OS=Escherichia coli                      | 2                                             | 19,92%                |        |
|                                                                          | 30S ribosomal protein S3 OS=Escherichia coli                      | 4                                             | 34,76%                |        |
|                                                                          | 30S ribosomal protein S4 OS=Escherichia coli                      | 2                                             | 23,84%                |        |
| F14                                                                      | 30S ribosomal protein S6 OS=Escherichia coli                      | 10                                            | 73,28%                |        |
|                                                                          | 50S ribosomal protein L14 OS=Escherichia coli                     | 2                                             | 30,08%                |        |
|                                                                          | 50S ribosomal protein L5 OS=Escherichia coli                      | 5                                             | 34,64%                |        |
|                                                                          | 50S ribosomal protein L9 OS=Escherichia coli                      | 3                                             | 27,52%                |        |
|                                                                          | 30S ribosomal protein S10 OS=Escherichia coli                     | 4                                             | 35,92%                |        |
|                                                                          | 30S ribosomal protein S11 OS=Escherichia coli                     | 3                                             | 36,64%                |        |
|                                                                          | 30S ribosomal protein S12 OS=Escherichia coli                     | 3                                             | 41,13%                |        |
|                                                                          | 30S ribosomal protein S2 OS=Escherichia coli                      | 13                                            | 60,59%                |        |
|                                                                          | 30S ribosomal protein S3 OS=Escherichia coli                      | 13                                            | 56,65%                |        |
|                                                                          | 30S ribosomal protein S4 OS=Escherichia coli                      | 6                                             | 44,37%                |        |
| 30S ribosomal protein S5 OS=Escherichia coli                             | 4                                                                 | 34,13%                                        |                       |        |
| 30S ribosomal protein S6 OS=Escherichia coli                             | 4                                                                 | 32,82%                                        |                       |        |
| 50S ribosomal protein L10 OS=Escherichia coli                            | 6                                                                 | 38,79%                                        |                       |        |
| 50S ribosomal protein L11 OS=Escherichia coli                            | 4                                                                 | 33,80%                                        |                       |        |
| 50S ribosomal protein L14 OS=Escherichia coli                            | 2                                                                 | 30,08%                                        |                       |        |
| 50S ribosomal protein L15 OS=Escherichia coli                            | 8                                                                 | 59,03%                                        |                       |        |
| 50S ribosomal protein L17 OS=Escherichia coli                            | 4                                                                 | 26,77%                                        |                       |        |
| 50S ribosomal protein L18 OS=Escherichia coli                            | 2                                                                 | 17,95%                                        |                       |        |
| 50S ribosomal protein L2 OS=Escherichia coli                             | 3                                                                 | 15,38%                                        |                       |        |
| 50S ribosomal protein L20 OS=Escherichia coli                            | 6                                                                 | 30,51%                                        |                       |        |
| 50S ribosomal protein L21 OS=Escherichia coli                            | 4                                                                 | 56,25%                                        |                       |        |
| 50S ribosomal protein L23 OS=Escherichia coli                            | 3                                                                 | 33,00%                                        |                       |        |
| 50S ribosomal protein L24 OS=Escherichia coli                            | 3                                                                 | 39,42%                                        |                       |        |
| 50S ribosomal protein L3 glutamine methyltransferase OS=Escherichia coli | 3                                                                 | 8,71%                                         |                       |        |
| 50S ribosomal protein L3 OS=Escherichia coli                             | 6                                                                 | 35,89%                                        |                       |        |
| 50S ribosomal protein L4 OS=Escherichia coli                             | 18                                                                | 79,60%                                        |                       |        |
| 50S ribosomal protein L5 OS=Escherichia coli                             | 9                                                                 | 44,13%                                        |                       |        |
| 50S ribosomal protein L6 OS=Escherichia coli                             | 2                                                                 | 9,71%                                         |                       |        |
| 50S ribosomal protein L9 OS=Escherichia coli                             | 10                                                                | 63,76%                                        |                       |        |

Supplementary Figure S12 | Data Base Research Results Edited.

## Supplementary Tables

### Supplementary Table S1 | Amino acid sequences of HRNR fragments generated as HRNR polypeptides or SUMO3-(His)<sub>6</sub>-fusion proteins

|                            |                                                                                                   |
|----------------------------|---------------------------------------------------------------------------------------------------|
| rHRNR <sub>1050-1172</sub> | THGQHGSTSGQSSSCGQHGA55GQSSSHGQHGS65SQSSGYGRQGS6SGGQSPGHGRGSGSRQSPSYGRHGS6SGR55SSGQHGSGLGESSGFHHES |
| rHRNR <sub>2591-2684</sub> | SQHGS6SGH55GYGQHGSRS6GQSSRGERHG55GSSSHYGQHGS6SRQSSGHGRQGS6SGGQSPSRGRHGSGYGH55SHGQHGS6SGR55SRGPY   |



**Supplementary Table S2 | HRNR-primer-sequences used in this study**

| Name                     | Oligonucleotide-Sequence                 | A.T.1  | A.T.2  | vector   |
|--------------------------|------------------------------------------|--------|--------|----------|
| SUMO-hrnr-2-F            | <u>ACCCATGGGCAACACGGTTC</u>              | 71,3°C |        | pET-Sumo |
| SUMO-hrnr-2-R            | <u>TCAAGACTCGTGGTGACCAAAGC</u>           | 69,6°C |        |          |
| pSu-hr3-b-2591-f (Bsal)  | AAGGTCTCAAGGT <u>AGTCAGCATGGGTCTGGCT</u> | 60°C   | 77,1°C | pSumo3   |
| pSu-hr3-b-2684-r (BamHI) | AAGGATCCTTA <u>AATATGGGCCACGGCTGGAA</u>  | 60°C   | 77,4°C |          |

A.T.1: Annealing temperature underlined sequence; A.T.2: Annealing temperature whole sequence. The complementary coding sequence is underlined.
